# Supplementary material for: Use of Alternative Medicine for Cancer and Its Impact on Survival
Source: Oxford University Press journal article supplement (doi:10.1093/jnci/djx145), 2017-06-22
Supplement: djx145_supp.docx [file djx145_supp.docx]

**SUPPLEMENTARY MATERIALS**

**Use of alternative medicine for cancer and its impact on survival**

Skyler B. Johnson, MD1, Henry S. Park, MD, MPH1, Cary P. Gross, MD2 and James B. Yu, MD, MHS1,2

1Department of Therapeutic Radiology, Yale School of Medicine, New Haven, CT, 2Cancer Outcomes, Public Policy, and Effectiveness Research (COPPER) Center, Yale School of Medicine, New Haven, CT

**Corresponding Author:**

Skyler B. Johnson, MD

Department of Therapeutic Radiology, Yale School of Medicine

HRT 138, 333 Cedar St

New Haven, CT 06520

Tel: (203) 785-5703

E-mail: [**skyler.johnson@yale.edu**](mailto:skyler.johnson@yale.edu)

**Supplementary Table 1. Patient characteristics of patients with breast, prostate, lung and colorectal cancer**

| **Characteristics** | **Conventional Cancer Treatment, No. (%)** | **Alternative Medicine, No. (%)** |
| --- | --- | --- |
| Total | 1,681,906 (99.98%) | 281 (0.02%) |
| Mean age (inter-quartile range) | 62 (55-70) | 60 (52-69) |
| Cancer Type |  |  |
| Breast | 644,864 (38.4%) | 123 (43.8%) |
| Prostate | 638,094 (37.9%) | 72 (25.6%) |
| Lung | 257,683 (15.3%) | 52 (18.5%) |
| Colorectal | 141,265 (8.4%) | 34 (12.1%) |
| Gender |  |  |
| Male | 861,985 (51.3%) | 122 (43.4%) |
| Female | 819,921 (48.7%) | 159 (56.6%) |
| Race |  |  |
| White | 1,334,020 (79.3%) | 217 (77.2%) |
| Black | 200,358 (11.9%) | 29 (10.3%) |
| Hispanic | 68,319 (4.1%) | 17 (6.1%) |
| Other | 79,209 (4.7%) | 18 (6.4%) |
| Income* |  |  |
| <$48,000 | 641,602 (38.6%) | 85 (30.5%) |
| ≥$48,000 | 1,022,356 (61.4%) | 194 (69.5%) |
| Education† |  |  |
| <80% HSE | 606,823 (37.4%) | 75 (27.7%) |
| ≥80% HSE | 1,014,890 (62.6%) | 196 (72.3%) |
| Residence Setting |  |  |
| Metropolitan | 1,368,390 (84%) | 238 (87.4%) |
| Non-metropolitan | 261,236 (16%) | 34 (12.6%) |
| Geographic area |  |  |
| Northeast | 341,161 (20.9%) | 44 (16.7%) |
| South Atlantic | 367,532 (22.5%) | 33 (12.5%) |
| Midwest | 428,264 (26.3%) | 67 (25.5%) |
| South | 225,756 (13.8%) | 7 (2.7%) |
| Intermountain West | 71,560 (4.4%) | 34 (12.9%) |
| Pacific | 197,839 (12.1%) | 78 (29.7%) |
| Insurance Type |  |  |
| None | 37,689 (2.2%) | 12 (4.3%) |
| Private | 847,530 (50.4%) | 150 (53.4%) |
| Medicaid | 79,136 (4.7%) | 15 (5.3%) |
| Medicare | 670,590 (39.9%) | 87 (30.9%) |
| Government/Unknown | 46,961 (2.8%) | 17 (6.1%) |
| Facility Type |  |  |
| Community | 545,724 (37.2%) | 86 (37.2%) |
| Academic | 922,820 (62.8%) | 145 (62.8%) |
| Clinical Stage |  |  |
| I | 607,861 (35.9%) | 58 (20.6%) |
| II | 822,532 (48.6%) | 142 (50.4%) |
| III | 251,513 (14.8%) | 81 (28.7%) |
| Charlson-Deyo Comorbidity |  |  |
| 0 | 1,359,513 (80.8%) | 251 (89.3%) |
| 1 | 256,654 (15.3%) | 23 (8.2%) |
| ≥2 | 65,739 (3.9%) | 7 (2.5%) |

* Income is expressed as median household income by zip code of residence. Abbreviations: HSE-High school education

† Education is expressed as the percentage of residents by zip code receiving a high school.

**Supplementary Table 2. Logistic regression of covariates associated with selection of alternative medicine**

| **Variables** | **Odds Ratio* (95%CI)** | **P†** |
| --- | --- | --- |
| Age, continuous | 0.99 (0.98-1.01) | 0.79 |
| Cancer Type |  |  |
| Prostate | 1.00 (Reference) |  |
| Breast | 2.56 (1.40-4.68) | 0.002 |
| Lung | 3.16 (1.85-5.40) | <0.001 |
| Colorectal | 1.60 (0.88-2.90) | 0.12 |
| Gender |  |  |
| Male | 1.00 (Reference) |  |
| Female | 1.02 (0.63-1.65) | 0.94 |
| Race |  |  |
| White | 1.00 (Reference) |  |
| Black | 1.29 (0.80-2.07) | 0.29 |
| Hispanic | 0.97 (0.50-1.89) | 0.94 |
| Other | 1.02 (0.59-1.76) | 0.93 |
| Income‡ |  |  |
| <$48,000 | 1.00 (Reference) |  |
| ≥$48,000 | 0.99 (0.70-1.42) | 0.96 |
| Education§ |  |  |
| <80% HSE | 1.00 (Reference) |  |
| ≥80% HSE | 1.46 (1.02-2.08) | 0.04 |
| Residence Setting |  |  |
| Metropolitan | 1.00 (Reference) |  |
| Non-metropolitan | 0.92 (0.60-1.41) | 0.72 |
| Geographic area |  |  |
| Northeast | 1.00 (Reference) |  |
| South Atlantic | 0.65 (0.38-1.12) | 0.12 |
| Midwest | 1.24 (0.82-1.87) | 0.32 |
| South | 0.26 (0.11-0.62) | 0.003 |
| Intermountain West | 3.09 (1.81-5.29) | <0.001 |
| Pacific | 3.16 (2.10-4.74) | <0.001 |
| Insurance Type |  |  |
| None | 1.00 (Reference) |  |
| Private | 0.79 (0.34-1.82) | 0.58 |
| Medicaid | 0.74 (0.28-1.98) | 0.55 |
| Medicare | 0.66 (0.27-1.58) | 0.35 |
| Government/Unknown | 1.41 (0.53-3.79) | 0.49 |
| Facility Type |  |  |
| Community | 1.00 (Reference) |  |
| Academic | 0.95 (0.71-1.26) | 0.70 |
| Clinical Stage |  |  |
| I | 1.00 (Reference) |  |
| II | 3.31 (2.21-4.95) | <0.001 |
| III | 3.87 (2.47-6.07) | <0.001 |
| Charlson-Deyo Comorbidity |  |  |
| 0 | 1.00 (Reference) |  |
| 1 | 0.52 (0.32-0.85) | 0.008 |
| ≥2 | 0.64 (0.28-1.46) | 0.27 |

* Multivariate model. Abbreviations: CI=confidence interval; HSE=High school education.

† P values were calculated by a two-sided multivariable logistic regression

‡Income is expressed as median household income by zip code of residence

§Education is expressed as the percentage of residents by zip code receiving a high school
